# Supplementary material
Source: PubMed Central journal article supplement (PMC10119613)
Supplement: mmc1.pdf [file mmc1.pdf]

iScience, Volume 26

## **Supplemental information**

**Prioritizing exhausted T cell marker**

**genes highlights immune subtypes in pan-cancer**

**Chunlong Zhang, Qi Sheng, Xue Zhang, Kang Xu, Xiaoyan Jin, Weiwei Zhou, Mengying Zhang, Dezhong Lv, Changbo Yang, Yongsheng Li, Juan Xu, and Xia Li**

## Supplemental Figures

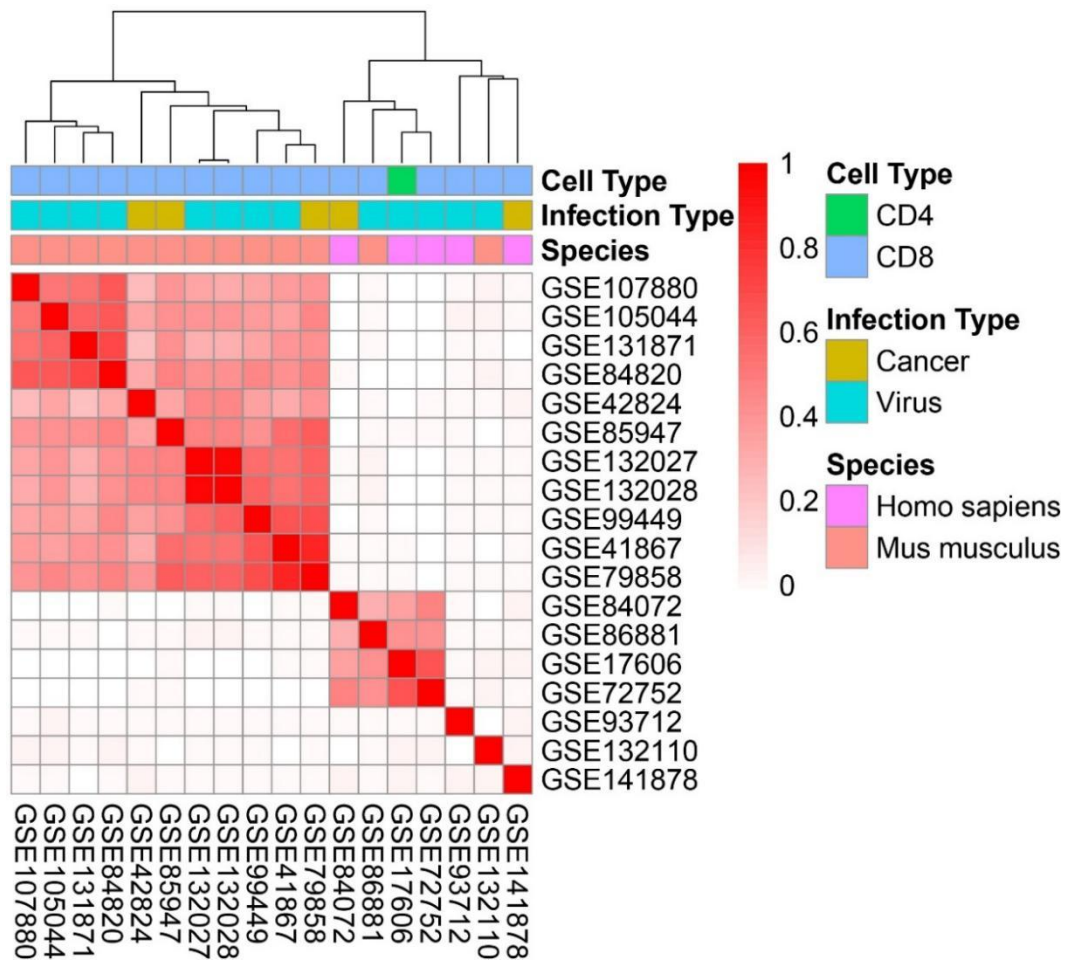

**Figure S1.** The correlation of exhaustion-related expression profiles based on candidate genes. The color shows the Pearson correlation coefficient. Related to Figure 2.

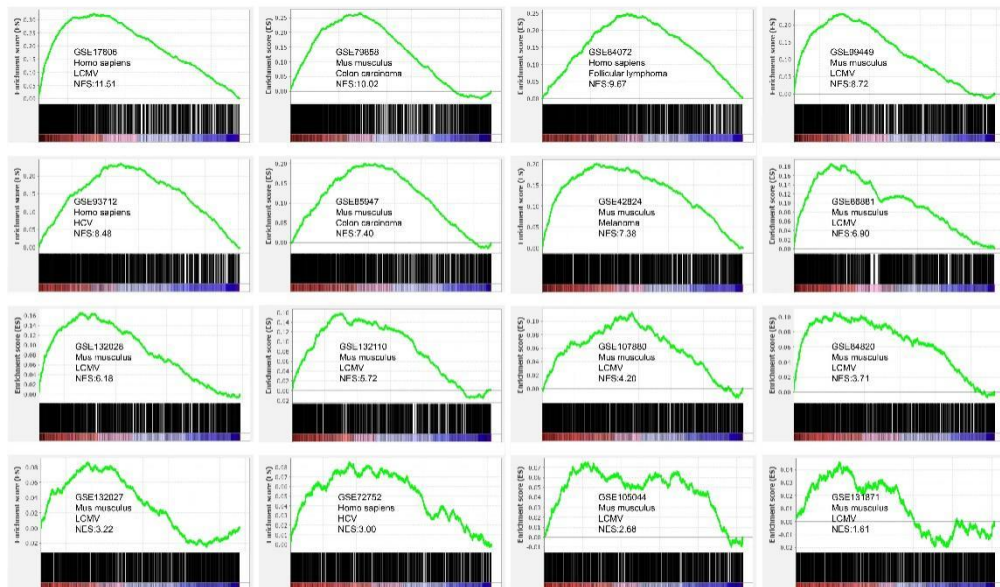

**Figure S2.** The GSEA enrichment results of candidate genes in different expression profiles. Related to Figure 2.

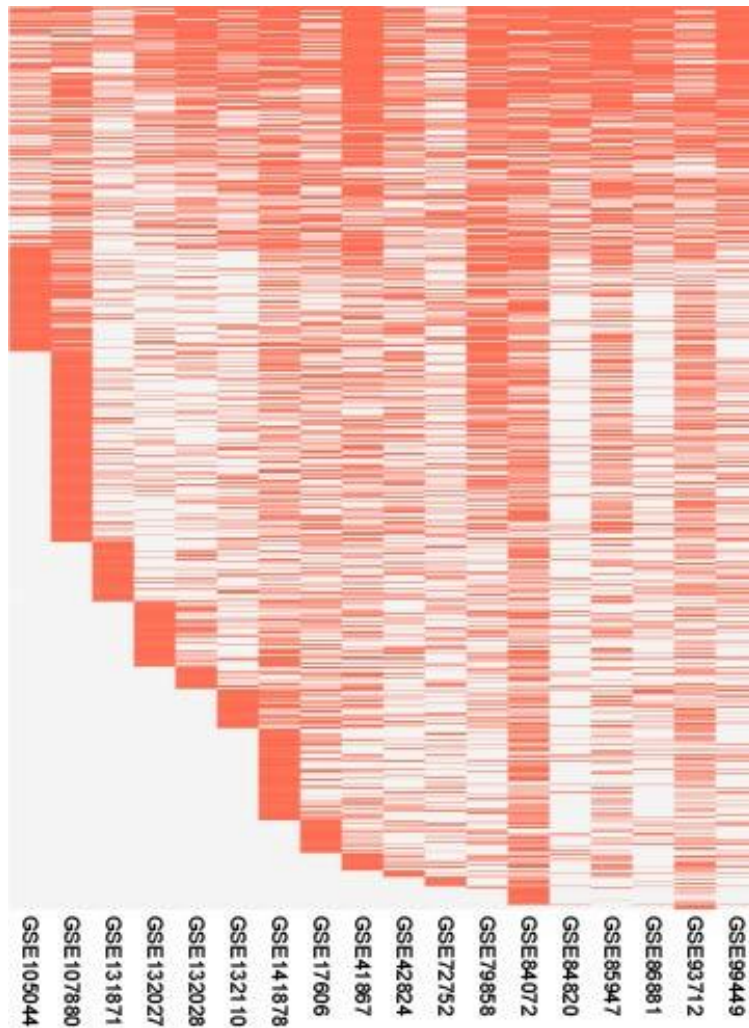

**Figure S3.** The leading edge results of candidate genes in different expression profiles. The x-axis shows the candidate genes, and the y-axis shows the exhaustion-related expression profiles. The red color represents the candidate gene as the leading edge gene in expression profile. Related to Figure 2.

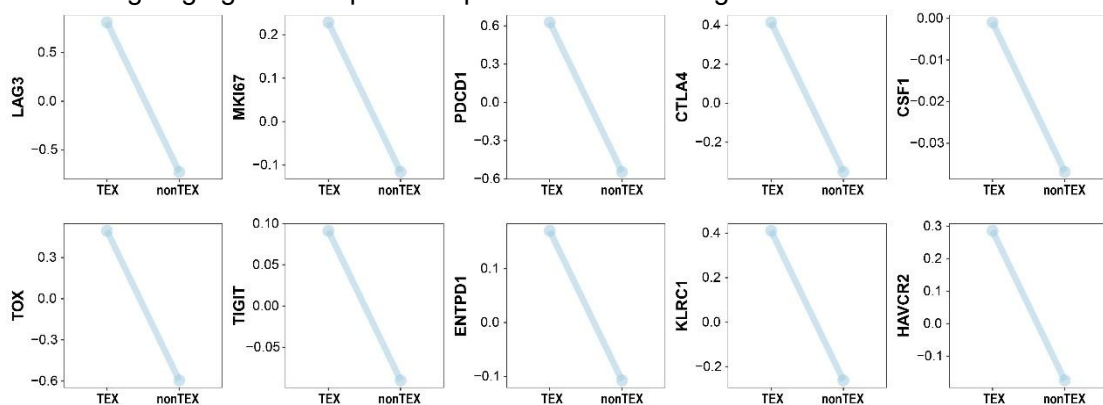

**Figure S4.** The expression levels of marker genes between TEX and nonTEX samples in mouse single-cell expression profile. The x-axis shows the different cell types, and the y-axis shows the expression levels. Related to Figure 6.
